# Supplementary material for: Combretastatin A4 phosphate induces rapid regression of tumor neovessels and growth through interference with vascular endothelial-cadherin signaling
Source: JCI journal article supplement (doi:10.1172/jci24586), 2005-10-14
Supplement: sd1 [file 1]

## Supplemental Figure 1

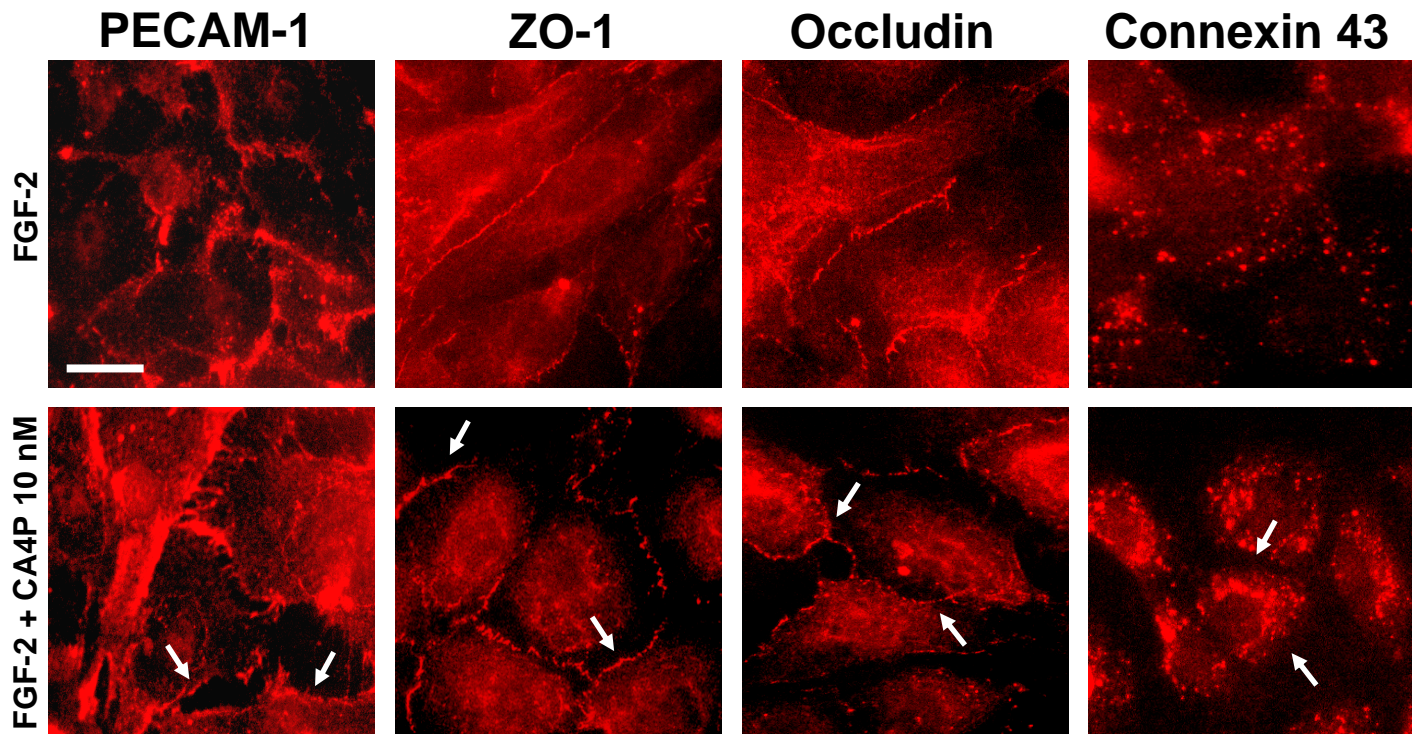

## Supplemental Figure 2

P- $\beta$ -catenin Ser33/37/Thr41

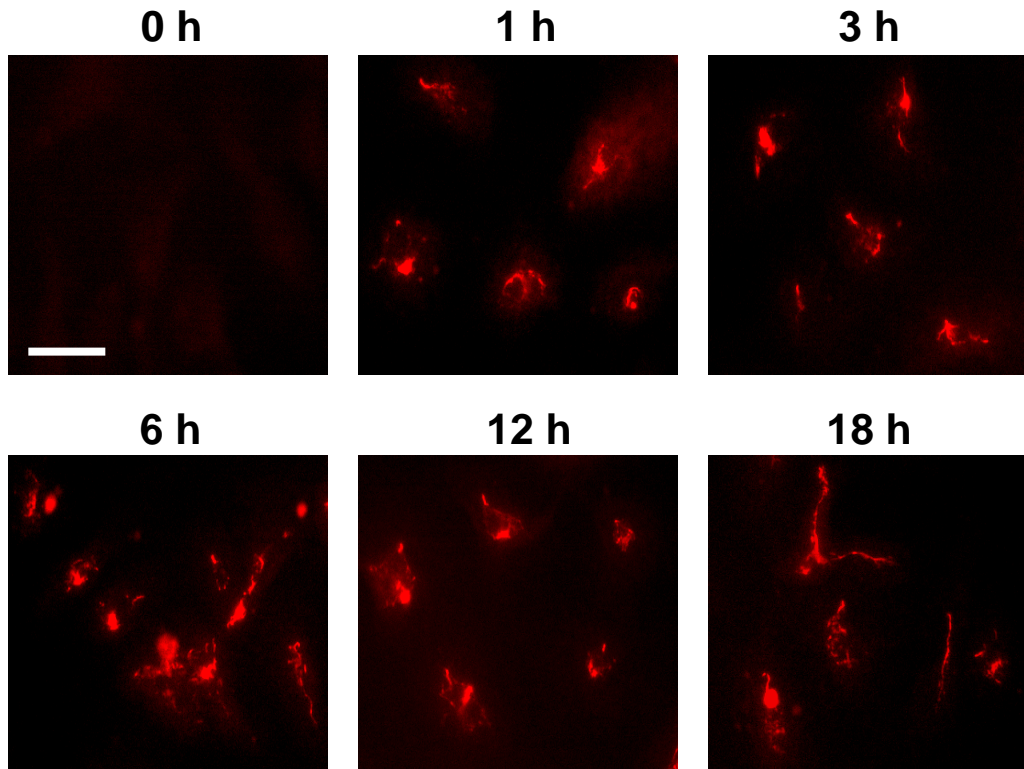

### Supplemental Figure 1

Combretastatin A4 phosphate (CA4P) does not disrupt the junctional proteins PECAM-1, ZO-1, Occludin and Connexin 43.

The localization of PECAM-1, ZO-1, Occludin and Connexin 43 of FGF-2-stimulated HUVECs was determined by fluorescent microscopy after 18 hours of treatment with 10 nM CA4P. Arrows show the persistent presence of the junctional protein on the cell membrane after the endothelial cells seem to have lost the contact with adjacent cells. Magnification 40×. Scale bar = 10μm.

### Supplemental Figure 2

Combretastatin A4 phosphate (CA4P) induces serine/threonine phosphorylation of  $\beta$ -catenin.

The expression of phospho- $\beta$ -catenin Ser33/37/Thr41 of FGF-2-stimulated HUVECs was determined by fluorescent microscopy at different time points upon CA4P treatment (10 nM). Magnification 40×. Scale bar = 10μm.
